# Supplementary material
Source: MDPI journal article supplement (https://www.mdpi.com/2571-550X/1/3/23)
Supplement: s1 [file s1]

## Sheet: Sheet1
Site	Core #/depth (m)	Lab Code	238U	226Ra	210Pb	228Ra	228Th	40K	D.R. (Gy/Ka)	σd (%)	n	De (Gy)	Age (Ka)	Method
Mid-Brisbane	MB1 / 1	16-0115-001	68 ± 9	26 ± 3	45 ± 10	36 ± 4	33 ± 2	537 ± 34	2.96 ± 0.23	28	47	23.92 ± 1.25	8.08 ± 0.77	CAM
												17.37 ± 1.92	5.86 ± 0.80	MAM
	MB1 / 1.7	16-0115-002	20 ± 5	17 ± 2	19 ± 5	22 ± 2	24 ± 2	561 ± 32	2.52 ± 0.18	15	66	27.24 ± 0.82	10.83 ± 0.84	CAM
	MB2 / 1.4	16-0115-003	48 ± 7	17 ± 2	41 ± 8	19 ± 2	22 ± 2	498 ± 31	2.43 ± 0.18	60	56	1.32 ± 0.09	0.54 ± 0.06	MAM
Logan	LOG1 / 1.2	16-0115-004	23 ± 7	15 ± 2	17 ± 6	24 ± 2	22 ± 2	372 ± 21	1.73 ± 0.13	25	44	15.39 ± 0.83	8.88 ± 0.81	CAM
												13.01 ± 1.05	7.51 ± 0.82	MAM
	LOG1 / 1.6	16-0115-005	56 ± 7	21 ± 2	51 ± 9	28 ± 3	26 ± 2	433 ± 26	2.11 ± 0.16	20	49	16.05 ± 0.74	7.61 ± 0.68	CAM
Albert	ALB / 1.1	16-0115-007	13 ± 7	11 ± 2	10 ± 9	10 ± 2	13 ± 2	276 ± 20	1.19 ± 0.09	12	33	11.34 ± 0.53	9.51 ± 0.82	CAM
	ALB / 1.5	16-0115-008	13 ± 3	7 ± 1	9 ± 3	5 ± 1	14 ± 1	322 ± 19	1.23 ± 0.08	19	70	10.73 ± 0.42	8.71 ± 0.66	CAM
	ALB / 1.9	16-0115-009	13 ± 5	9 ± 1	10 ± 4	11 ± 1	15 ± 1	333 ± 21	1.33 ± 0.09	15	20	12.04 ± 0.68	9.08 ± 0.81	CAM
